# Supplementary material
Source: PubMed Central journal article supplement (PMC3773575)
Supplement: cr2013102x1.pdf [file cr2013102x1.pdf]

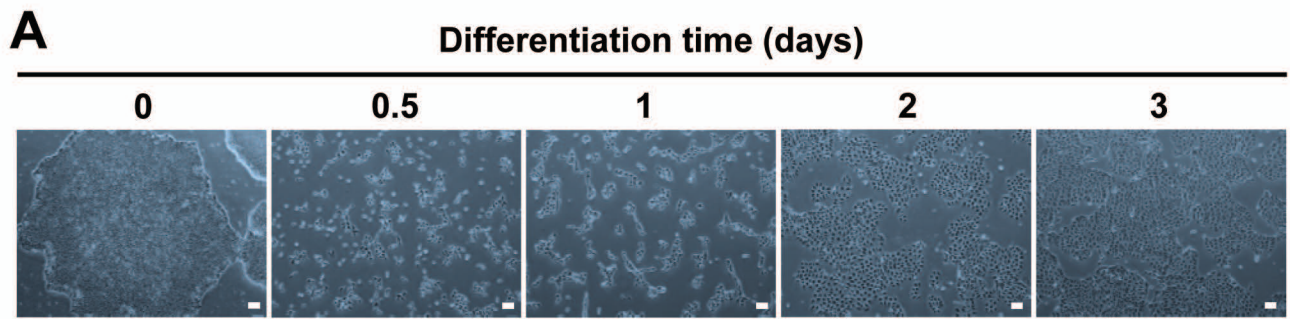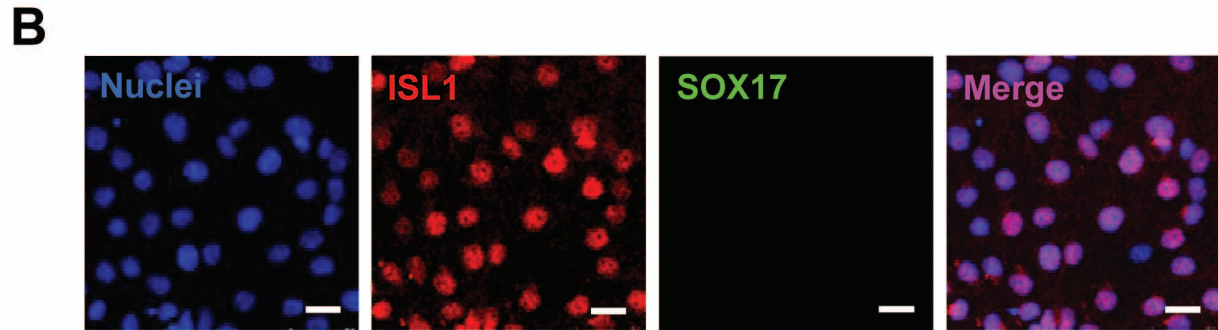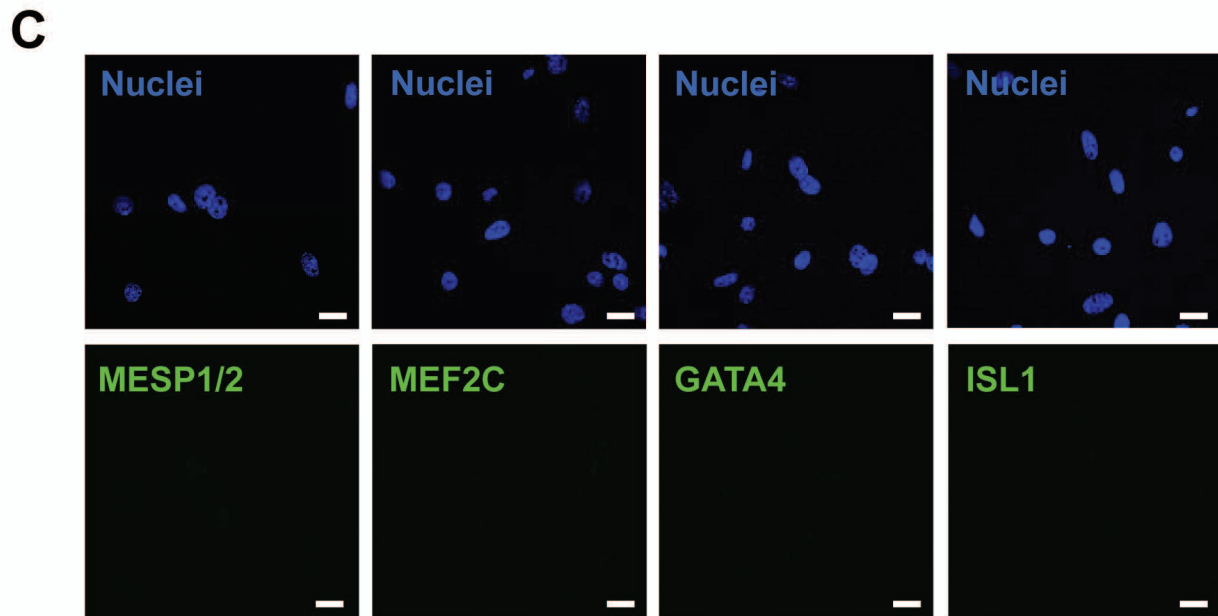

**Supplementary information, Figure S1** Characteristics of homogenous cardiovascular progenitor cells induced from H9 human ESCs. (A) Phase-contrast images showing cell morphology during H9 human ESC differentiation following the treatment of cardiovascular progenitor cell (CVPC) induction medium, CIM. Scale Bars = 100  $\mu$ m. (B) Immunofluorescence analysis showing the expression of CVPC marker ISL1 but not definitive endoderm marker SOX17 in the cells treated by CIM for 3 days. Scale Bars = 25  $\mu$ m. C, Immunofluorescence analysis showing the absence of CVPC markers in the cells cultured in Basal CIM for 3 days. Scale Bars = 25  $\mu$ m.
