# Supplementary material
Source: PubMed Central journal article supplement (PMC3773575)
Supplement: cr2013102x2.pdf [file cr2013102x2.pdf]

**A**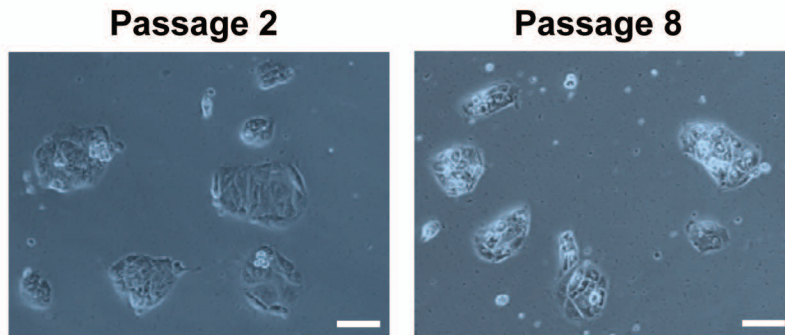**B**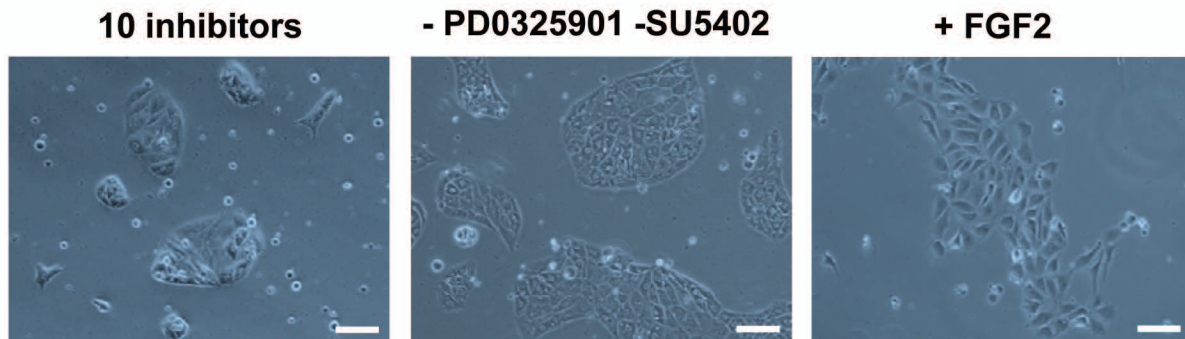

**Supplementary information, Figure S2** Condition detection for hESC-derived CVPC maintenance and expansion. (A) Phase contrast images showing the morphology of CVPC colonies at passages 2 or 8 using a pool of 10 signal inhibitors. Scale Bars = 100  $\mu$ m. (B) Phase-contrast images showing the morphology of CVPC colonies at passage 5 in the presence or absence of PD0325901, SU5402 or FGF2. PD0325901, mitogen-activated protein kinase inhibitor; SU5402, fibroblast growth factor receptor inhibitor; -, indicates withdrawal; +, indicates addition. Scale Bars = 100  $\mu$ m.
