# Supplementary material
Source: PubMed Central journal article supplement (PMC3773575)
Supplement: cr2013102x3.pdf [file cr2013102x3.pdf]

**Supplementary information, Table S1** Signal inhibitors used for the maintenance of hPSC-derived

CVPCs

| Inhibitor name     | Targeted pathway | Company  | Working concentration |
|--------------------|------------------|----------|-----------------------|
| SU5402             | FGF              | Merck    | 1.0 $\mu$ M           |
| dorsomorphin       | BMP              | Sigma    | 2.0 $\mu$ M           |
| LY411575           | Notch            | Stemgent | 5.0 nM                |
| SHH Antagonist     | Hedgehog         | Stemgent | 0.3 $\mu$ M           |
| VEGFR Inhibitor IV | VEGF             | Merck    | 0.1 $\mu$ M           |
| PDGFR Inhibitor V  | PDGF             | Merck    | 20 nM                 |
| PD0325901          | MEK              | Stemgent | 0.4 $\mu$ M           |
| LE135              | RA               | Axon     | 1.0 $\mu$ M           |
| A83-01             | Activin/Nodal    | Stemgent | 0.5 $\mu$ M           |
| CHIR99021          | GSK3             | Stemgent | 3.0 $\mu$ M           |
