# Supplementary material
Source: PubMed Central journal article supplement (PMC3773575)
Supplement: cr2013102x4.pdf [file cr2013102x4.pdf]

**Supplementary information, Table S2** Primers used for RT-PCRs

| Genes         | Primer Sequence (5' to 3')                                 | AT (°C) | PS (bp) |
|---------------|------------------------------------------------------------|---------|---------|
| <i>SSEA1</i>  | F-CTTCAACTGGACGCTCTCCTA<br>R-GTTGGTGGTAGTAGCGGACC          | 60      | 191     |
| <i>MESP2</i>  | F-GCTTCCCTCTTTCCATCCAGGA<br>R-CCCTGAAAGACATCACTTGGAA       | 60      | 122     |
| <i>KDR</i>    | F-GTGATCGGAAATGACACTGGAG<br>R-CATGTTGGTCACTAACAGAAGCA      | 60      | 124     |
| <i>TBX5</i>   | F-TGTGGCTAAAATTCCACGAA<br>R-TTCTGGAAGGAGACGAGCTG           | 60      | 283     |
| <i>NKX2-5</i> | F-CAAGTGTGCGTCTGCCTTT<br>R-CAGCTCTTTCTTTTCGGCTCTA          | 60      | 100     |
| <i>TNNT2</i>  | F-TTCACCAAAGATCTGCTCCTCGCT<br>R-TTATTACTGGTGTGGAGTGGGTGTGG | 60      | 166     |
| <i>ACTA2</i>  | F-CTATGAGGGCTATGCCTTGCC<br>R-GCTCAGCAGTAGTAACGAAGGA        | 60      | 122     |
| <i>MYH11</i>  | F-GGTCACGGTTGGGAAAGATGA<br>R-GGCAGGTGTTTATAGGGGT           | 60      | 193     |
| <i>PECAM1</i> | F-ATCATTCTAGCGCATGGCCTGGT<br>R-ATTTGTGGAGGGCGAGGTCATAGA    | 60      | 159     |
| <i>CDH5</i>   | F-TGGAGAAGTGGCATCAGTCAACAG<br>R-TCTACAATCCCTTGCAGTGTGAG    | 60      | 118     |
| <i>MYL3</i>   | F-CAGAACCCACACAGGCAGA<br>R-TGCTGGAGCATAGGCAGGAA            | 60      | 107     |
| <i>SLC8A1</i> | F-GCCAACCTGTCTTCAGGAAGG<br>R-CGTCTGCAATGGTGATTACAGT        | 60      | 72      |
| <i>CNN1</i>   | F-GTCAACCCAAAATTGGCACCA<br>R-ACCTTGTTTCCTTTTCGTCTTCG       | 60      | 183     |

---

|              |                                                     |    |     |
|--------------|-----------------------------------------------------|----|-----|
| <i>VWF</i>   | F-CCGATGCAGCCTTTTCGGA<br>R-TCCCAAGATACACGGAGAGG     | 60 | 171 |
| <i>GAPDH</i> | F-AAGGTGAAGGTCGGAGTCAAC<br>R-GGGGTCATTGATGGCAACAATA | 60 | 102 |

---

AT, annealing temperature; PS, product size; F, forward; R, reverse.
