# Supplementary material
Source: PubMed Central journal article supplement (PMC3773575)
Supplement: cr2013102x5.pdf [file cr2013102x5.pdf]

**Supplementary information, Table S3** Primers used for qPCRs

| Genes         | Primer Sequence (5' to 3')                              | AT (°C) | PS (bp) |
|---------------|---------------------------------------------------------|---------|---------|
| <i>OCT4</i>   | F-AGTGCCCGAAACCCACACTG<br>R-ACCACACTCGGACCACATCCT       | 60      | 81      |
| <i>SOX17</i>  | F-GTGGACCGCACGGAATTTG<br>R-GGAGATTCACACCGGAGTCA         | 60      | 94      |
| <i>PAX6</i>   | F-AACAGACACAGCCCTCACAAACA<br>R-CGGGAACTTGAAGTGGAACTGAC  | 60      | 275     |
| <i>T</i>      | F-CAGTGGCAGTCTCAGGTTAAGAAGGA<br>R-CGCTACTGCAGGTGTGAGCAA | 60      | 122     |
| <i>MESP2</i>  | F-GCTTCCCTCTTTCCATCCAGGA<br>R-CCCTGAAAGACATCACTTGGAA    | 60      | 122     |
| <i>PDGFRA</i> | F-TGGCAGTACCCCATGTCTGAA<br>R-CCAAGACCGTCACAAAAAGGC      | 60      | 88      |
| <i>NKX2-5</i> | F-CAAGTGTGCGTCTGCCTTT<br>R-CAGCTCTTTCTTTTCGGCTCTA       | 60      | 100     |
| <i>ISL1</i>   | F-ATCAGGTTGTACGGGATCAAATG<br>R-ATGTGATACACCTTGGAGCG     | 60      | 92      |
| <i>GAPDH</i>  | F-AAGGTGAAGGTCGGAGTCAAC<br>R-GGGGTCATTGATGGCAACAATA     | 60      | 102     |

AT, annealing temperature; PS, product size; F, forward; R, reverse.
